# Supplementary material for: Interpretable network-guided epistasis detection
Source: bioRxiv or medRxiv preprint supplement (doi:10.1101/2020.09.24.310136), 2021-10-22
Supplement: Supplementary file [file media-1.pdf]

September 24, 2020

## Supplementary materials

**Table 1:** eQTL enriched Pathways

---

|                                                        |
|--------------------------------------------------------|
| GO hyaluronoglycosaminidase activity                   |
| GO hexosaminidase activity                             |
| KEGG glycosaminoglycan degradation                     |
| GO hydrolase activity hydrolyzing o glycosyl compounds |
| GO hydrolase activity acting on glycosyl bonds         |
| NABA ecm regulators                                    |
| GO response to UV B                                    |
| GO hyaluronan catabolic process                        |
| REACTOME hyaluronan metabolism                         |
| GO hyaluronan metabolic process                        |
| REACTOME chondroitin sulfate dermatan sulfate          |
| GO aminoglycan catabolic process                       |
| NABA matrisome associated                              |
| GO cellular response to UV B                           |
| REACTOME CS DS degradation                             |
| REACTOME hyaluronan uptake and degradation             |

---

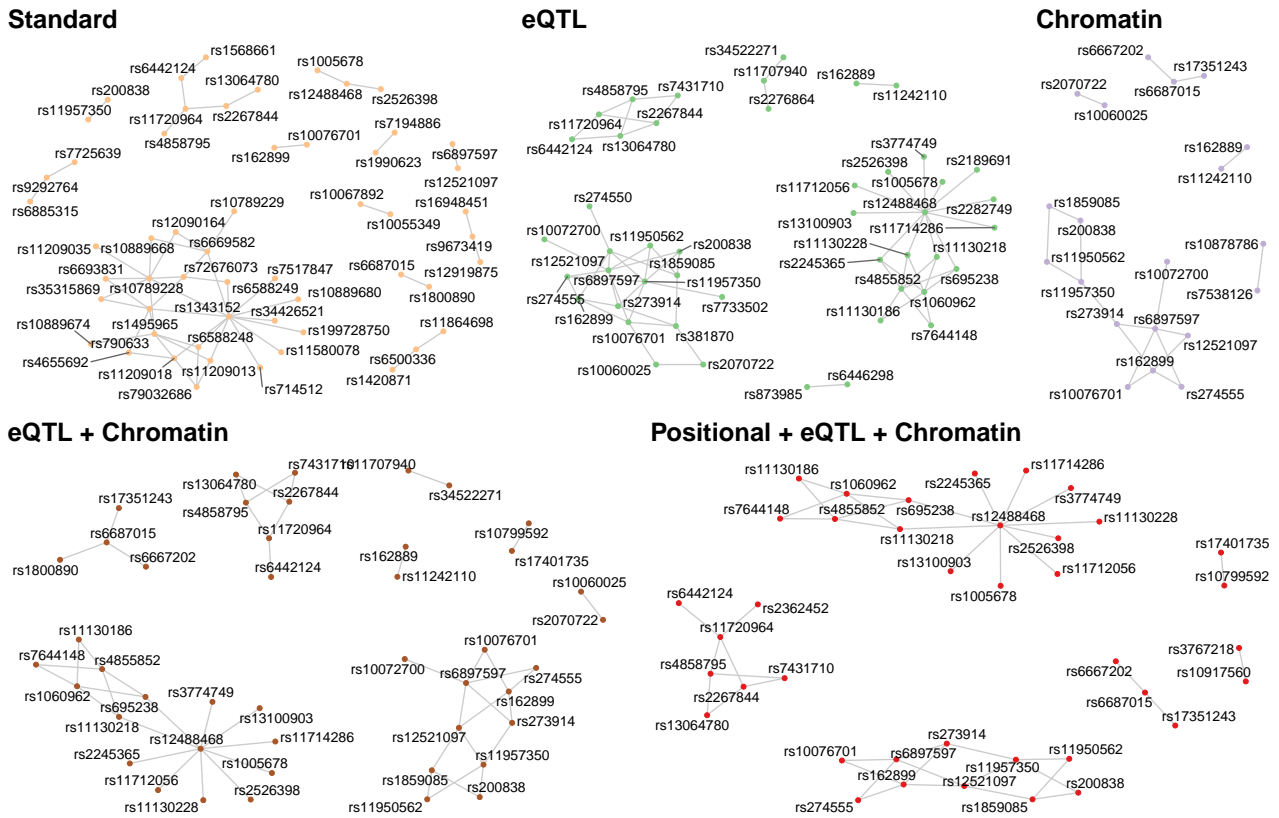

**Fig. 1:** Epistasis networks built from the significant SNP models of the different analysis (Section ??). The *Positional* analysis is absent, as no SNP model was significant.

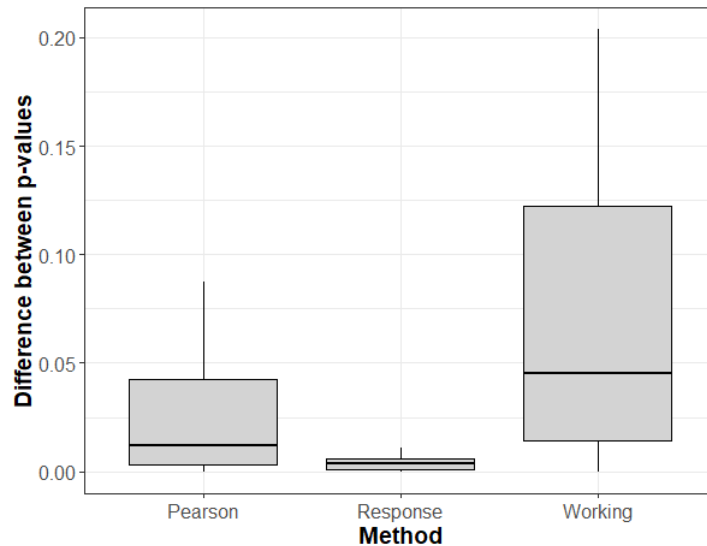

**Fig. 2:** To choose the best way of computing residuals in order to obtain the phenotype adjusted for population structure, we randomly extracted five SNPs in the dataset (rs12488468, rs1005678, rs11714286, rs2267844, rs11720964) and compared the associated outputs of epistasis detection. First, we computed the different residuals: we ran a logistic regression model with binary phenotypes as response variable and 7 PCs as independent variables. We derived three vectors of adjusted phenotypes from response, working and Pearson residuals. Then, we looked for statistical epistasis: we computed three linear models using the different residuals as response variable and SNP interactions as dependent variables. Finally, we performed logistic regressions with the binary phenotype as dependent variable, two SNPs and their interaction as explanatory variables, in addition to 7 PCs as covariates. We aimed at identifying the residuals leading to P-values as close as possible to the P-values from the logistic regression. P-values obtained with response residuals as phenotypes are the closest to the ones obtained with the logistic regression and are therefore selected as adjusted phenotypes in our analysis.
